# Supplementary material
Source: publisher figshare collection journal article supplement (https://tandf.figshare.com/articles/dataset/_/5813859)
Supplement: Supplementary file 1 [file 2]

## Supplementary Material - Appendix SA2

### Evaluation Results Based on Voter Registration Data for North Carolina

This appendix includes the data description and evaluation results based on voter registration data for North Carolina. The voter registration data is publicly available for free from the North Carolina State Board of Elections (<http://dl.ncsbe.gov/index.html?prefix=data>), and, in raw form, includes all active and inactive voters in the state who are currently on record (as of the date of the data download, which for this paper is September 28, 2017). The voter sample used for evaluation is obtained from the raw data by first selecting all active voters with valid race/ethnicity who were born on or after 1925 (4,450,135 voters), and then from those keep only the voters with available name and geographic information. These selection criteria result in a validation sample with 3,603,031 observations.

**Table 1. Match Rates for Names and Geography**

|                                                      |                  |
|------------------------------------------------------|------------------|
| Match rate for first names                           | 0.892            |
| Match rate for surnames                              | 0.941            |
| Match rate for geography <sup>2</sup>                | 0.961            |
| Match rate for matches on both surname and geography | 0.905            |
| Match rate for matches on all three features         | 0.810            |
| <i>N obs</i> <sup>1</sup>                            | <i>4,450,135</i> |

Note 1: Includes all individuals with valid race/ethnicity who were active voters as of September 28, 2017 and were born on or after 1925.

Note 2: Voters who were matched with a geographical unit without any people are considered failed matches and thus are excluded from the numerator of the match rate.

**Table 2: Self-Reported Race/Ethnicity Composition for the Validation Sample**

| Race/Ethnicity | Nobs             | Percent       |
|----------------|------------------|---------------|
| Hispanic       | 86,723           | 2.4%          |
| NH Black       | 615,949          | 17.1%         |
| NH White       | 2,847,336        | 79.0%         |
| NH API         | 19,291           | 0.5%          |
| NH AIAN        | 23,607           | 0.7%          |
| NH Multiracial | 10,455           | 0.3%          |
| <i>Total</i>   | <i>3,603,361</i> | <i>100.0%</i> |

NOTE: The validation sample includes all active voters with valid race/ethnicity who were born on or after 1925, and have non-missing name and geographic demographic information.

**Table 3: Distribution of Loans by Race/Ethnicity: Proxies vs. Self-Report**

| Method      | Hispanic | NH Black | NH White | NH API | Weighted<br>Average Overall<br>Deviation from<br>Self-Report | % Diff. in<br>Average Deviation<br>BIFSG - BISG | Relative<br>Efficiency of<br>BIFSG vs. BISG |
|-------------|----------|----------|----------|--------|--------------------------------------------------------------|-------------------------------------------------|---------------------------------------------|
| Self-Report | 2.4%     | 17.1%    | 79.0%    | 0.5%   | (0)                                                          |                                                 |                                             |
| BIFSG       | 2.6%     | 21.0%    | 73.8%    | 0.6%   | 4.8%                                                         | -22.0%                                          | 64.6%                                       |
| BISG        | 3.0%     | 21.8%    | 72.3%    | 0.8%   | 6.2%                                                         |                                                 |                                             |

NOTE: Differences in prevalences between BIFSG and BISG are statistically significant at the 5 percent level for all racial/ethnic groups, as indicated by both pairwise t-tests and non-parametric sign tests.

**Table 4. Correlation between Proxy Probability and Self-Reported Race/Ethnicity**

| Method | Correlation Coefficients |          |          |        |                     | % Diff. in Average<br>Correlation<br>BIFSG - BISG | Relative Efficiency<br>of BIFSG vs. BISG |
|--------|--------------------------|----------|----------|--------|---------------------|---------------------------------------------------|------------------------------------------|
|        | Hispanic                 | NH Black | NH White | NH API | Weighted<br>Average |                                                   |                                          |
| BIFSG  | 0.761                    | 0.668    | 0.681    | 0.741  | 0.678               | 5.3%                                              | 10.8%                                    |
| BISG   | 0.725                    | 0.635    | 0.646    | 0.695  | 0.644               |                                                   |                                          |

NOTE: Differences between the BIFSG and BISG correlations are statistically significant at the 5 percent level for all racial/ethnic groups, as indicated by a comparison of the 95 percent confidence intervals for Fisher's Z transformation of the correlation coefficients.

**Table 5. Accuracy Metrics for Alternative Classification Methods**

| Classification<br>Method | Proxy<br>Method | Race/<br>Ethnicity | Total Applications in Group |                                 | %<br>Unclassified <sup>1</sup> | False<br>Negative<br>Rate <sup>2</sup><br>(%) | False<br>Positive<br>Rate <sup>3</sup><br>(%) |
|--------------------------|-----------------|--------------------|-----------------------------|---------------------------------|--------------------------------|-----------------------------------------------|-----------------------------------------------|
|                          |                 |                    | Based on<br>Self-Reporting  | Estimated<br>by Proxy<br>Method |                                |                                               |                                               |
| MAP                      | BIFSG           | Hispanic           | 86,723                      | 83,737                          | 0                              | 27.8                                          | 25.2                                          |
|                          | BISG            | Hispanic           | 86,723                      | 90,880                          | 0                              | 26.8                                          | 30.1                                          |
|                          | BIFSG           | NH Black           | 615,949                     | 654,455                         | 0                              | 30.5                                          | 34.6                                          |
|                          | BISG            | NH Black           | 615,949                     | 648,664                         | 0                              | 34.1                                          | 37.4                                          |
|                          | BIFSG           | NH White           | 2,847,336                   | 2,831,229                       | 0                              | 8.3                                           | 7.8                                           |
|                          | BISG            | NH White           | 2,847,336                   | 2,825,521                       | 0                              | 9.2                                           | 8.5                                           |
|                          | BIFSG           | NH API             | 19,291                      | 16,810                          | 0                              | 33.6                                          | 23.8                                          |
|                          | BISG            | NH API             | 19,291                      | 18,972                          | 0                              | 33.8                                          | 32.7                                          |
| 80%<br>Threshold         | BIFSG           | Hispanic           | 86,723                      | 60,969                          | 26.3                           | 19.6                                          | 15.7                                          |
|                          | BISG            | Hispanic           | 86,723                      | 54,935                          | 36.5                           | 22.3                                          | 22.1                                          |
|                          | BIFSG           | NH Black           | 615,949                     | 321,956                         | 45.5                           | 20.2                                          | 16.8                                          |
|                          | BISG            | NH Black           | 615,949                     | 230,181                         | 58.8                           | 22.6                                          | 14.6                                          |
|                          | BIFSG           | NH White           | 2,847,336                   | 2,256,512                       | 21.8                           | 2.6                                           | 3.9                                           |
|                          | BISG            | NH White           | 2,847,336                   | 2,059,445                       | 28.8                           | 2.1                                           | 3.7                                           |
|                          | BIFSG           | NH API             | 19,291                      | 12,412                          | 25.4                           | 24.8                                          | 12.7                                          |
|                          | BISG            | NH API             | 19,291                      | 13,072                          | 26.9                           | 24.3                                          | 18.3                                          |

Note 1: % Unclassified represents the number of individuals that self-report belonging to a particular group but cannot be classified by the proxy method, as percent of the total population that self-reports belonging to that group.

Note 2: False negatives in a particular group are individuals who self-report belonging to that group, but whom the proxy method categorizes into another group. The false negative rate is the ratio of the number of false negatives in that group to the total population that self-reports belonging to that group.

Note 3: False positives in a particular group are individuals whom the proxy method assigns to that group, when in fact they belong to another group. The false positive rate is computed as the ratio of the number of false positives categorized in that group to the total population that the proxy classifies in that group.
