# Supplementary material
Source: publisher figshare collection journal article supplement (https://tandf.figshare.com/articles/dataset/_/5813859)
Supplement: Supplementary file 3 [file 2]

Archive with 4 entries (4 files):
- Appendix_SA1_80pct_results.docx
- Appendix_SA1_80pct_results.pdf
- Appendix_SA2_NC_voters_results.docx
- Appendix_SA2_NC_voters_results.pdf
